# Supplementary figures and images for: Selection effects in identifying magnetic clouds and the importance of the closest approach parameter
Source: Copernicus journal article supplement (doi:10.5194/angeo-28-1539-2010), 2010-08-18

Magnitude of Bessel Field

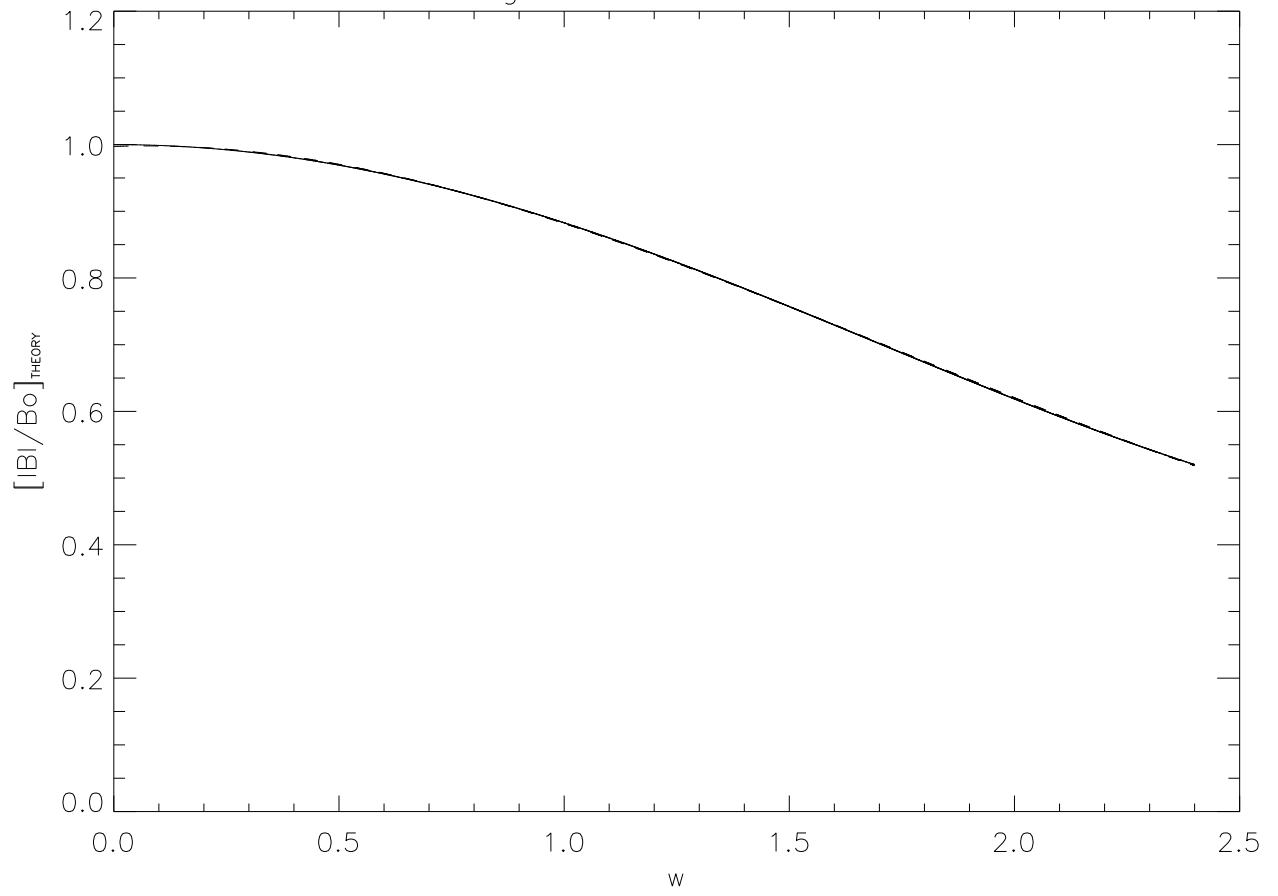

Supplement: Supplementary file 1 [file angeo-28-1539-2010-supplement.pdf]
